# Supplementary material for: Efficient functionalization of carbon nanohorns via microwave irradiation
Source: Royal Society of Chemistry journal article supplement (doi:10.1039/b900776h), 2009-01-01
Supplement: b900776h.pdf [file b900776h.pdf]

# **Efficient Functionalization of Carbon Nanohorns via Microwave Irradiation<sup>†</sup>**

Noelia Rubio,<sup>a</sup> M. Antonia Herrero,<sup>a</sup> Moreno Meneghetti,<sup>b</sup> Ángel Díaz-Ortiz,<sup>a</sup> Mauro Schiavon,<sup>c</sup> Maurizio Prato<sup>\*d</sup> and Ester Vázquez<sup>\*a</sup>

## **Supplementary Information**

| <b>a) Functionalization of 2a</b> |                  |                         |                         | <b>b) Functionalization of 2b</b> |                  |                         |                         |
|-----------------------------------|------------------|-------------------------|-------------------------|-----------------------------------|------------------|-------------------------|-------------------------|
| <b>Step</b>                       | <b>Power (W)</b> | <b>Hold time (min.)</b> | <b>Temperature (°C)</b> | <b>Step</b>                       | <b>Power (W)</b> | <b>Hold time (min.)</b> | <b>Temperature (°C)</b> |
| <b>1</b>                          | 50               | 0.3                     | 130                     | 1                                 | 30               | 1                       | 110                     |
| <b>2</b>                          | 30               | 1                       | 131                     | 2                                 | 20               | 1                       | 115                     |
| <b>3</b>                          | 50               | 0.3                     | 140                     | 3                                 | 30               | 1                       | 125                     |
| <b>4</b>                          | 30               | 1                       | 145                     | 4                                 | 20               | 1                       | 130                     |
| <b>5</b>                          | 50               | 60                      | 160                     | 5                                 | 30               | 40                      | 140                     |

Figure S1. Irradiation steps used at the CEM microwave

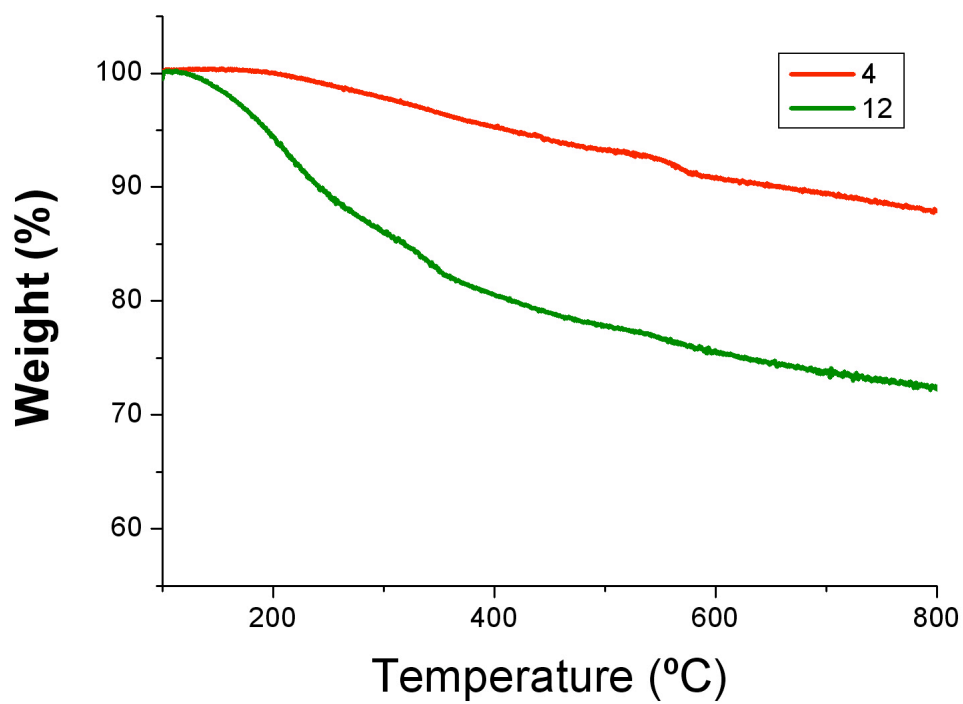

Figure S2: TGA analysis of the *f*-CNHs 4, *f*-CNHs 12.

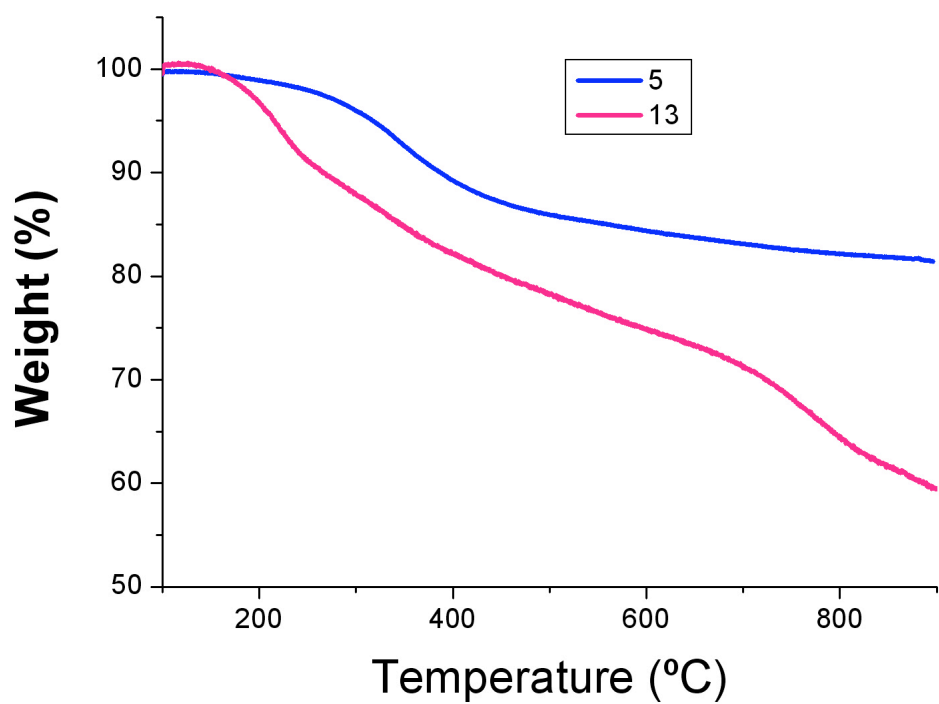

Figure S3: TGA analysis of the *f*-CNHs 5, *f*-CNHs 13.

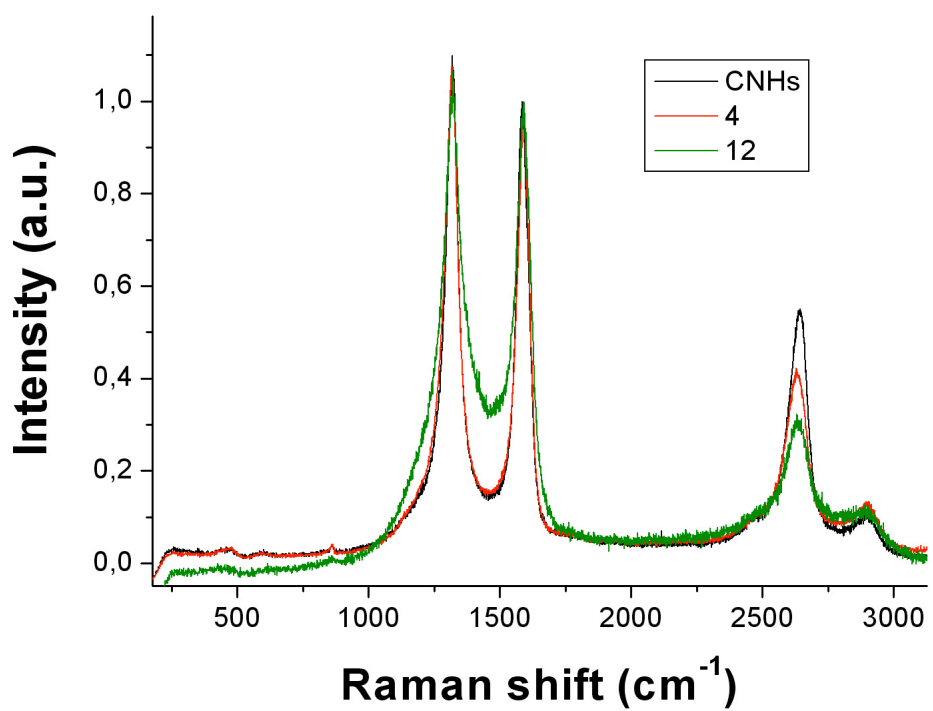

Figure S4: Raman spectra (633 nm) of Pristine CNHs, *f*-CNHs 4 and *f*-CNHs 12
